# Supplementary material
Source: MDPI journal article supplement (https://www.mdpi.com/2073-4352/4/1/32)
Supplement: s1 [file s1]

## Supplementary Information

**Figure S1.** X-ray powder diffraction pattern for complex **1** plotted against predicted pattern.

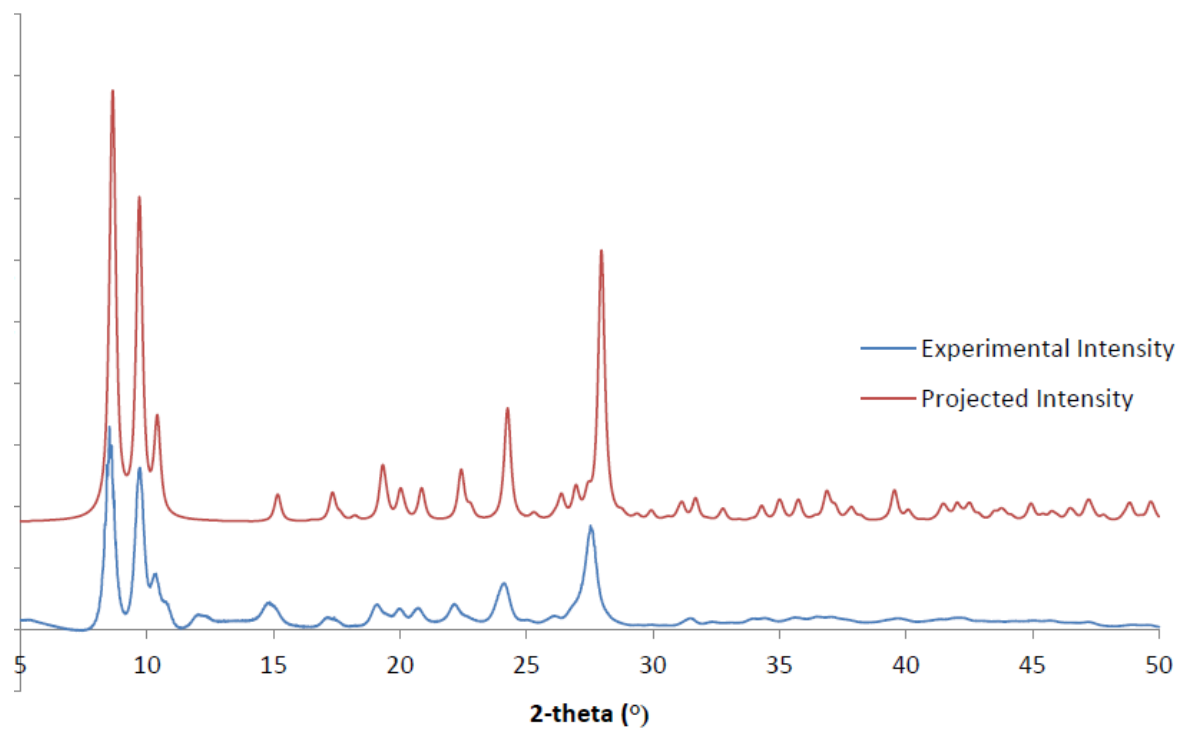

**Figure S2.** X-ray powder diffraction pattern for complex **2** plotted against predicted pattern.

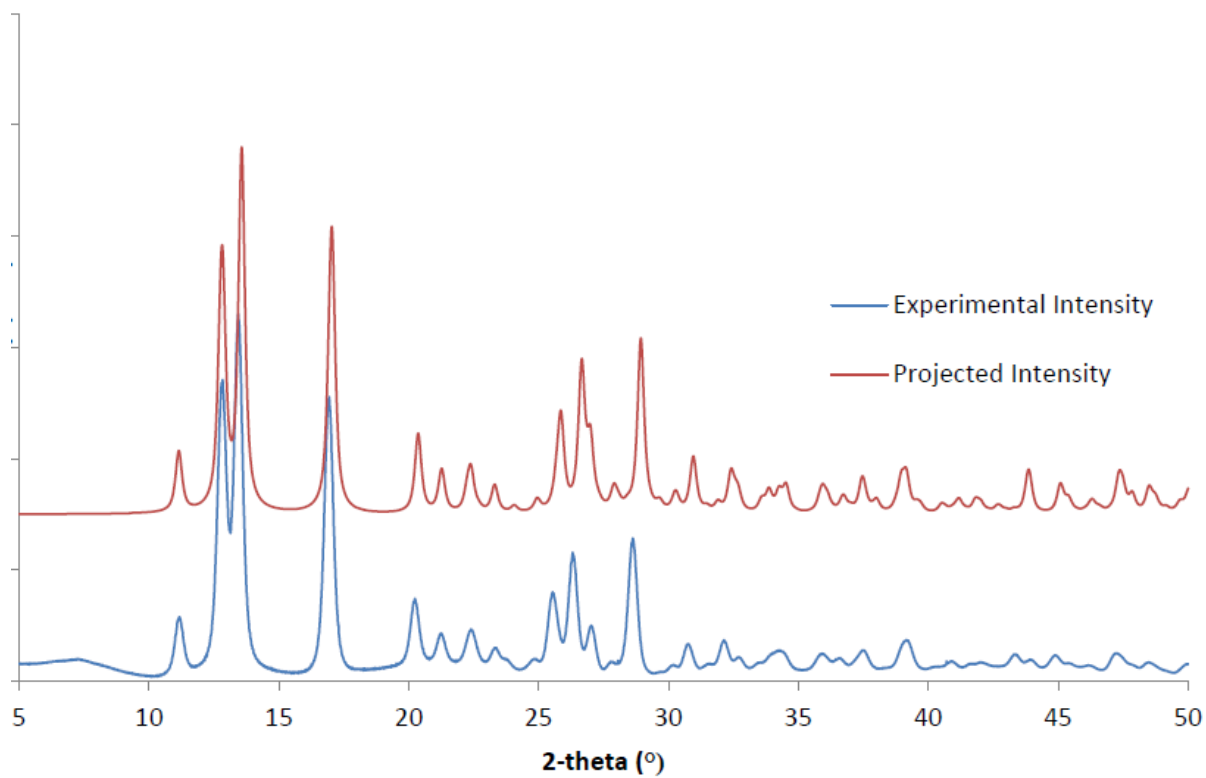

**Figure S3.** Thermogravimetric analysis trace for complex 1.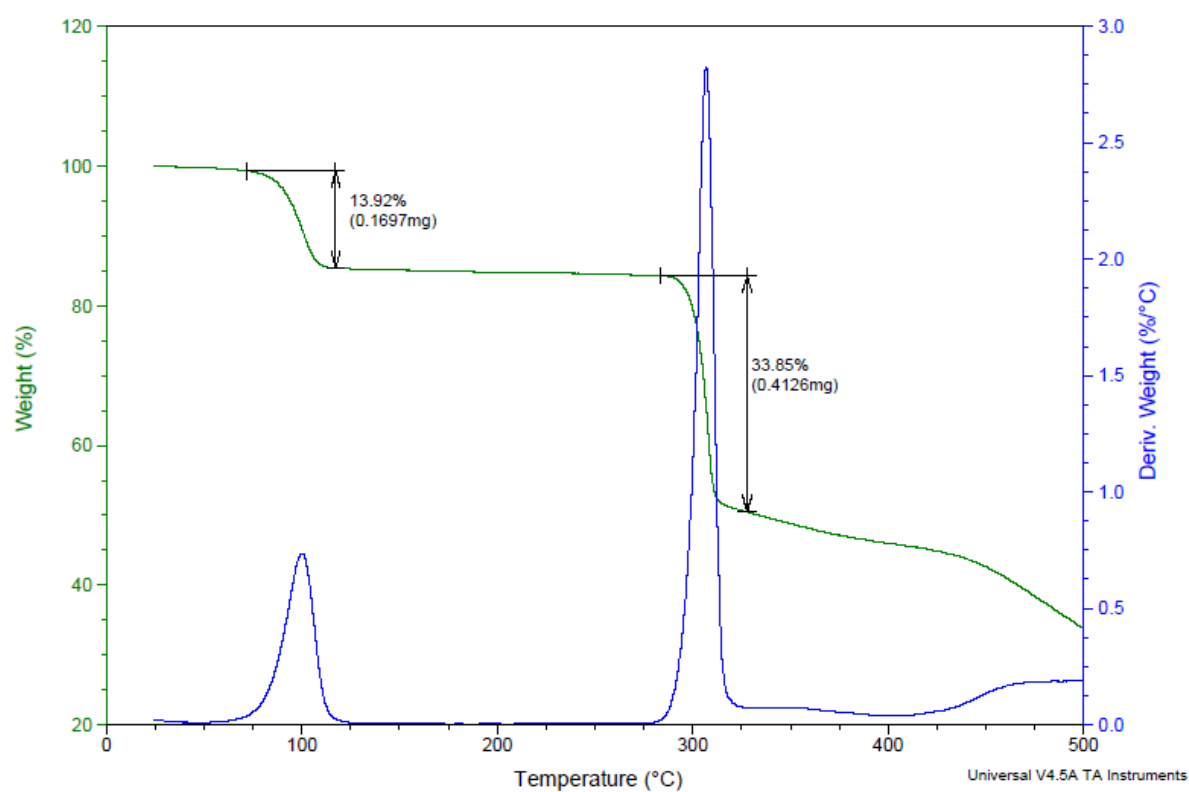**Figure S4.** Thermogravimetric analysis trace for complex 2.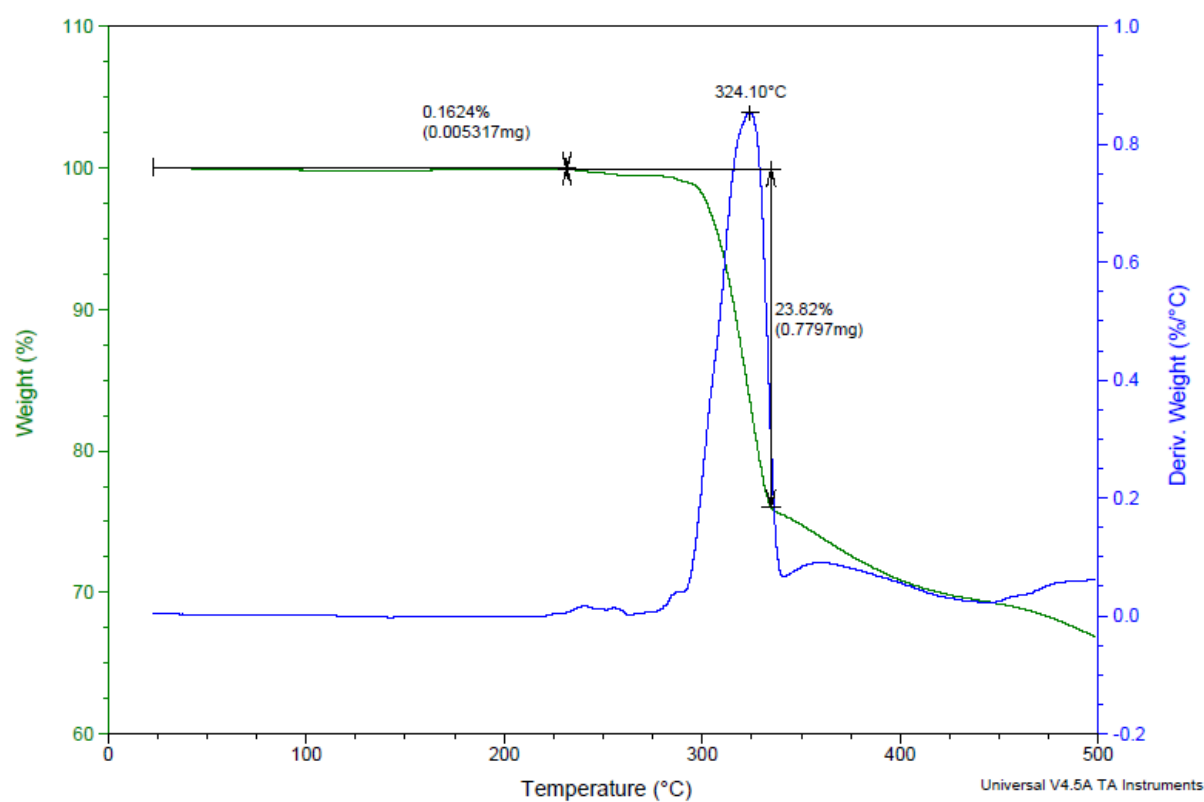

**Table S1.** Hydrogen bonding parameters for complex 1.

| <b>D</b> | <b>H</b> | <b>A</b>         | <b>d(D-H)/Å</b> | <b>d(H-A)/Å</b> | <b>d(D-A)/Å</b> | <b>D-H-A/°</b> |
|----------|----------|------------------|-----------------|-----------------|-----------------|----------------|
| O16      | H16      | O14 <sup>1</sup> | 0.844(10)       | 1.822(11)       | 2.662(2)        | 173(3)         |

$$^1 -1 + X, +Y, +Z.$$

© 2014 by the authors; licensee MDPI, Basel, Switzerland. This article is an open access article distributed under the terms and conditions of the Creative Commons Attribution license (<http://creativecommons.org/licenses/by/3.0/>).
